# Supplementary material
Source: MDPI journal article supplement (https://www.mdpi.com/2571-8789/8/1/33)
Supplement: s1 [file s1]

## Supplementary information (SI) for Soil Systems

Table S1 Layout of Assays for MicroPlate (GEN III)

| A1<br>Negative<br>control                         | A2<br>Dextrin                      | A3<br>D-Maltose                      | A4<br>D-Trehalose                       | A5<br>D-Cellobiose                | A6<br>Gentibiose                    | A7<br>Sucrose                        | A8<br>D-Turanose               | A9<br>Staychose                | A10<br>Positive control  | A11<br>pH 6               | A12<br>pH 5                |
|---------------------------------------------------|------------------------------------|--------------------------------------|-----------------------------------------|-----------------------------------|-------------------------------------|--------------------------------------|--------------------------------|--------------------------------|--------------------------|---------------------------|----------------------------|
| <b>B1</b><br><b>D-Raffinose</b>                   | B2<br>$\alpha$ -D-Lactose          | B3<br>D-Melibiose                    | B4<br>$\beta$ -Methyl-D-Glucoside       | B5<br>D-Salicin                   | B6<br>N-Acetyl-D-Glucosamine        | B7<br>N-Acetyl- $\beta$ -Mannosamine | B8<br>N-Acetyl-D-Galactosamine | B9<br>N-Acetyl-Neuraminic acid | B10<br>1% NaCl           | B11<br>4% NaCl            | B12<br>6% NaCl             |
| <b>C1</b><br><b><math>\alpha</math>-D-Glucose</b> | C2<br>D-Mannose                    | C3<br>D-Fructose                     | C4<br>D-Galactose                       | C5<br>3-Methyl Glucose            | C6<br>D-Fucose                      | C7<br>L-Fucose                       | C8<br>L-Rhamnose               | C9<br>Inosine                  | C10<br>1% Sodium Lactate | C11<br>Fusidic Acid       | C12<br>D-Serine            |
| <b>D1</b><br><b>D-Sorbitol</b>                    | D2<br>D-Mannitol                   | D3<br>D-Arabitol                     | D4<br>Myo-inositol                      | D5<br>Glycerol                    | D6<br>D-Glucose-6-PO <sub>4</sub>   | D7<br>D-Fructose-6-PO <sub>4</sub>   | D8<br>D-Aspartic Acid          | D9<br>D-Serine                 | D10<br>Troleandomycin    | D11<br>Rifamycin SV       | D12<br>Minocycline         |
| <b>E1</b><br><b>Gelatin</b>                       | E2<br>Glycl-L-Proline              | E3<br>L-Alanine                      | E4<br>L-Arginine                        | E5<br>L-Aspartic Acid             | E6<br>L-Glutamic Acid               | E7<br>L-Histidine                    | E8<br>L-Pyroglutamic Acid      | E9<br>L-Serine                 | E10<br>Lincomycin        | E11<br>Guanidine HCl      | E12<br>Niaproof 4          |
| <b>F1</b><br><b>Pectin</b>                        | F2<br>D-Galacturonic Acid          | F3<br>L-Galactonic Acid Lactone      | F4<br>D-Gluconic Acid                   | F5<br>D-Glucuronic Acid           | F6<br>Glucuronamide                 | F7<br>Mucic Acid                     | F8<br>Quinic Acid              | F9<br>D-Saccharic Acid         | F10<br>Vancomycin        | F11<br>Tetrazolium Violet | F12<br>Tetrazolium Blue    |
| <b>G1</b><br><b>p-Hydroxy-Phenylacetic Acid</b>   | G2<br>Methyl Pyruvate              | G3<br>D-Lactic Acid Methyl Ester     | G4<br>L-Lactic Acid                     | G5<br>Citric Acid                 | G6<br>$\alpha$ -Keto-Gglutaric Acid | G7<br>D-Malic Acid                   | G8<br>L-Malic Acid             | G9<br>Bromo-Succinic Acid      | G10<br>Nalidixic Acid    | G11<br>Lithium Chloride   | G12<br>Potassium Tellurite |
| <b>H1</b><br><b>Tween 40</b>                      | H2<br>$\gamma$ -Amino-Butyric Acid | H3<br>$\alpha$ -Hydroxy-Butyric Acid | H4<br>$\beta$ -Hydroxy-D,L-Butyric Acid | H5<br>$\alpha$ -Keto-Butyric Acid | H6<br>Acetoacetic Acid              | H7<br>Propionic Acid                 | H8<br>Acetic Acid              | H9<br>Formic Acid              | H10<br>Aztreonam         | H11<br>Sodium Butyrate    | H12<br>Sodium Bromate      |

Table S2 Chemical components analyzed in the leachate samples

| Chemical components              | Methods                   |
|----------------------------------|---------------------------|
| Grease and Oil                   | APHA 5520B                |
| Chlorinated Hydrocarbons         | EPA 8270                  |
| Organochlorine Pesticides        | APHA 6630B                |
| Organophosphorus Pesticides      | AOAC 974. 22              |
| Alkalinity                       | APHA 2320B                |
| Phosphate                        | APHA 4500 P-B,C           |
| Chloride                         | APHA 4500Cl <sup>-</sup>  |
| Nitrate Nitrogen                 | APHA 4500-NO <sub>2</sub> |
| Total Organic Carbon             | APHA 5310B                |
| Nitrite Nitrogen                 | APHA 4500-NO <sub>2</sub> |
| Volatile Fatty Acids             | EPA 8270                  |
| Metals                           | APHA 3112B                |
| Monocyclic Aromatic Hydrocarbons | EPA SW 8260B              |
| Alcohols                         | EPA 8270                  |

Table S3 Monocyclic Aromatic Hydrocarbon Components of Leachate Samples (mg/L)

| Component     | JSL   | AHL    | BBL    | TBL    | Standard Limits (EPA) |
|---------------|-------|--------|--------|--------|-----------------------|
| m+p-Xylene    | <0.01 | <0.01  | <0.001 | <0.001 | 0.001                 |
| o-Xylene      | <0.01 | <0.001 | <0.001 | <0.001 | 0.001                 |
| Benzene       | 0.01  | 0.22   | 0.6    | 0.4    | 0.005                 |
| Toluene       | <0.01 | 1.2    | 2.1    | 1.5    | 1.00                  |
| Ethyl Benzene | <0.01 | 0.86   | 0.85   | 0.8    | 0.70                  |

Table S4 Semi-volatile Organic Components of Leachate Samples (mg/L)

| Component                | JSL   | AHL   | BBL   | TBL   | Standard Limits (EPA) |
|--------------------------|-------|-------|-------|-------|-----------------------|
| Phenol                   | <0.01 | <0.01 | <0.01 | <0.01 | 0.5                   |
| o-Cresol                 | <0.01 | 0.09  | <0.01 | <0.01 | NA                    |
| Alpha Thujone            | <0.01 | <0.01 | <0.01 | <0.01 | NA                    |
| n-Butyl-Benzenesulfamide | <0.01 | <0.01 | <0.01 | <0.01 | NA                    |
| Camphor                  | <0.01 | <0.01 | <0.01 | <0.01 | 2                     |
| p-Cresol                 | <0.01 | 0.06  | <0.01 | <0.01 | 50                    |
| 1,8-Cineole              | <0.01 | <0.01 | <0.01 | <0.01 | NA                    |

NA - not available

Table S5 Characterization of soil sample collected from Taman Beringin Landfill

| Parameter | Units | Method        | Taman Beringin landfill |
|-----------|-------|---------------|-------------------------|
| Cr        | mg/kg | USEPA 3050 B  | 46                      |
| Ni        | mg/kg | USEPA 3050 B  | 21                      |
| Al        | mg/kg | USEPA 3050 B  | 49600                   |
| As        | mg/kg | USEPA 3050 B  | 103                     |
| Ca        | mg/kg | USEPA 3050 B  | 1608                    |
| Fe        | mg/kg | USEPA 3050 B  | 42900                   |
| Mn        | mg/kg | USEPA 3050 B  | 281                     |
| Mg        | mg/kg | USEPA 3050 B  | 127.2                   |
| Pb        | mg/kg | USEPA 3050 B  | 18                      |
| Cd        | mg/kg | USEPA 3050 B  | <0.01                   |
| Hg        | mg/kg | USEPA 3052    | <0.02                   |
| Na        | mg/kg | USEPA 3050 B  | 4.54                    |
| Cu        | mg/kg | USEPA 3050 B  | 59                      |
| Zn        | mg/kg | USEPA 3050 B  | 49                      |
| pH        |       |               | 7.57                    |
| Total N   | %     | ASTM E778-87  | 0.62                    |
| Total K   | mg/kg | ASTM E926-94  | 396.9                   |
| Total P   | mg/kg | ASTM D5198-92 | 568                     |

n =3

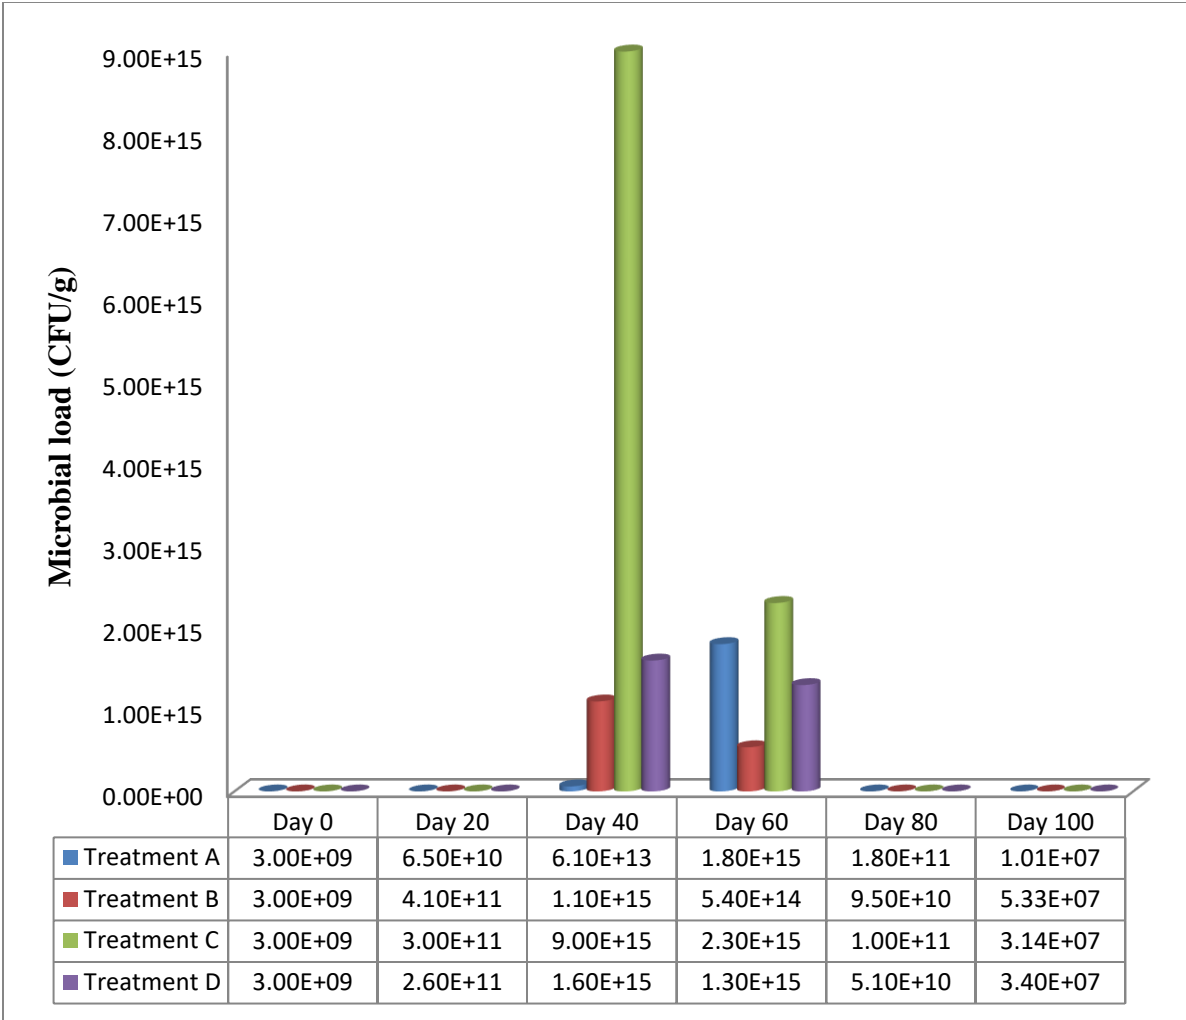

Figure S1 Bacterial counts during the 100 days of biomonitoring.
